# Supplementary material
Source: PubMed Central journal article supplement (PMC1838732)

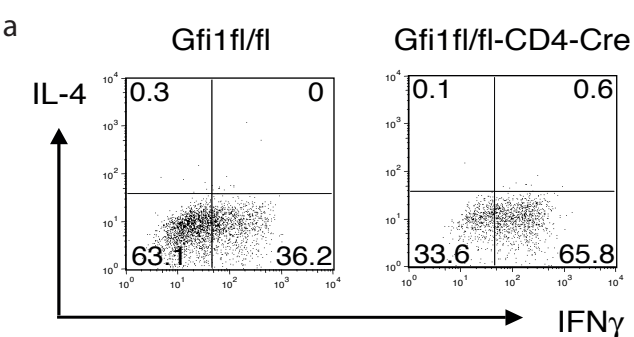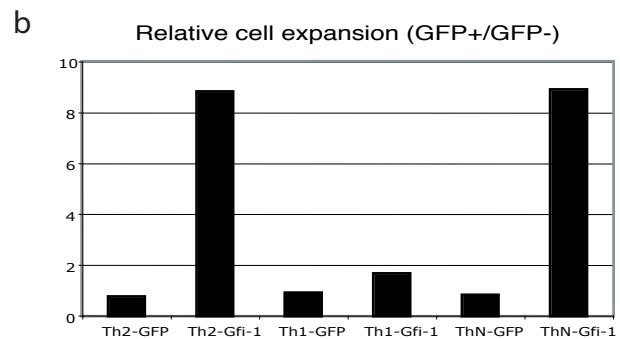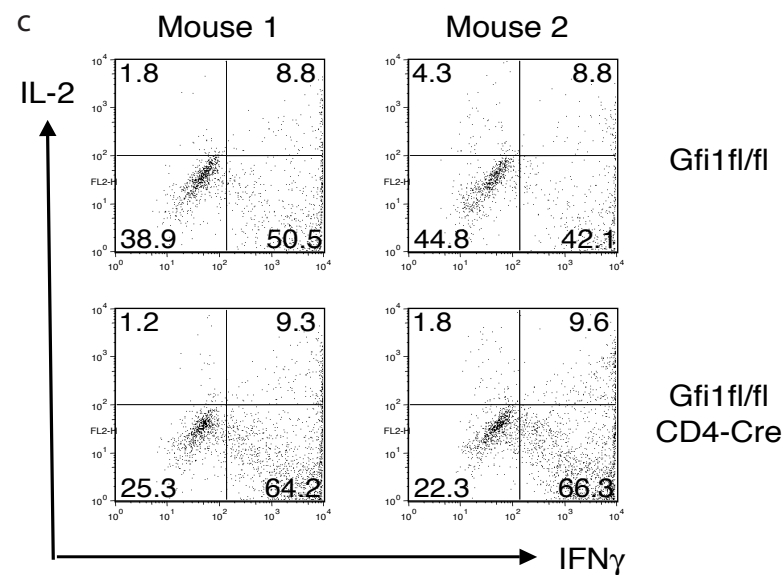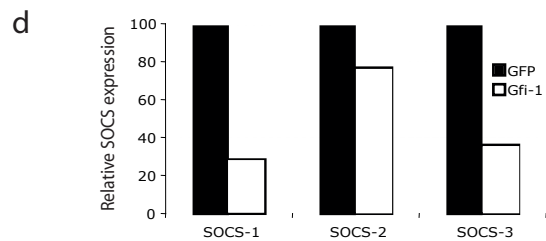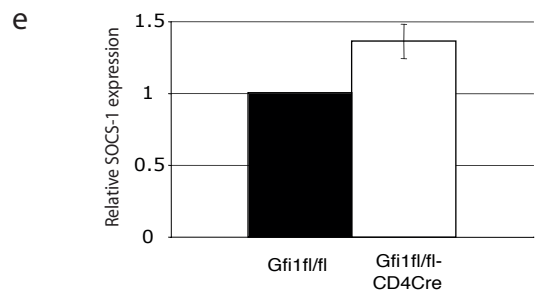

Supplement: pnas_0608981103_1.pdf [file pnas_0608981103_1.pdf]
